# Supplementary material for: Determination of heavy metal fractions in the sediments of oxbow lakes to detect the human impact on the fluvial system (Tisza River, SE Hungary)
Source: Copernicus journal article supplement (doi:10.5194/hess-2016-207), 2016-07-06
Supplement: Supplementary file [file hess-2016-207-AC4-supplement.pdf]

**Answer to comment on “Determination of heavy metal fractions in the sediments of oxbow lakes to detect the human impact on the fluvial system (Tisza River, SE Hungary)” by M. Tamás and A. Farsang**

**Answer to Anonymous Referee #2**

Thanks for the Referee’s suggestions that aim to improve the quality of the article. Thank you for judging the article to be considerable for HESS.

„The title is not clearly reflecting to the contents: Title refers to the whole fluvial system of the River Tisza while paper focuses on the oxbow lakes in the Hungarian section of the river.” – We modified the title of article.

„Language is not fluent.” – We reviewed and corrected the article from linguistic point of view.

„Authors have significantly new results but the conclusion is missing. Present manuscript should be complemented with a conclusion.” – We amended the implications and conclusions of the article.

„Authors use a parameter (B value) of a Hungarian regulation legal rule (6/2009 KvVM-EüMFVM) as a standard (5 page, line30). This kinds of measures are a compromise.” – We accept the statement of the Referee that we compared our result against the geochemical background instead of the B value used in the Hungarian regulation legal rule. We amended the Hungarian geological background values.

„Some of the observations are not explained and discussed. E.g.: page 8 lines 19-29: Observations: difference in mobility order in sediments between two kinds of oxbow lakes. Explanation of the phenomenon is missing.” – We amended the necessary explanation.

„There are some confusion within the chapters (e.g: sequence of methods) and some results appear in the discussion (page 8 lines 19-29).” – We fixed it.

„Introduction is too long. Several lines deal with the history of sequential extraction methods. I recommend to eliminate: page 2. Lines 39-40, Page 3 lines 1-26.” – We shortened the article.

„Formulae, symbols, abbreviations, and units are mostly correctly defined and used. (Exceptions are indicated in the pdf)” – We corrected the suggestions in regards of the formulas, symbols, abbreviations and we shortened the article in some cases. We amended the missing references.

Thanks for the Referees for their suggestions to improve our article.

Szeged, 2016. November 17.

Regards:

Andrea Farsang Dr.  
Associate Professor University of Szeged  
Department of Physical Geography and  
Geoinformatics

Margit Tamás  
PhD student University of Szeged  
Department of Physical Geography and  
Geoinformatics
